# Supplementary material for: Application of Aptamers Improves CRISPR-Based Live Imaging of Plant Telomeres
Source: PubMed Central journal article supplement (PMC7468473; doi:10.3389/fpls.2020.01254), 2020-08-20
Supplement: DataSheet_1.pdf [file DataSheet_1.pdf]

Supplementary Table 1. List of primers used in cloning steps and PCR reactions.

| Primer name      | Primer sequence (5' to 3')                                        |
|------------------|-------------------------------------------------------------------|
| Apta2-FWD        | AAGTGGCACCGAGTCGGTGCTTTTTTTCTAGACCCAGCTTTC<br>TTGTACa             |
| Apta2-Rev        | <u>accggt</u> GTACAAGAAAGCTGGGTCTAGAAAAAAGCACCGACT<br>CGGTGCCACTT |
| Apta2-Rev2       | CCGACTCGGTGCCACTTCC                                               |
| SS42             | CGACTAAGGGTTTCTTATATGC                                            |
| ecori-35s-f1     | AAGCAGAATTCAACATGGTGGAGCACGACACA                                  |
| ecori-35s-r1     | TGCTTAGCGAATTCCCCCGTGTTCTCTCCAATG                                 |
| PRS5A-FWD        | gaattcGATGAGAGAGGAACTG                                            |
| PRS5A-REV        | gaattcGGTGAGAGAAACAGAG                                            |
| Cas9-XVE-F       | acagctatgacatgattacgaattcATAGTTTAACTGAAGGCGGGAAAC                 |
| XVE-Lexa-A-R     | atcaattcccTCAGACTGTGGCAGGGAAAC                                    |
| XVE-Lexa-A-F     | cacagtctgaGGGAATTGATCCCCCCTC                                      |
| LexA-Cas9-R      | ttcttatccatggcgcgccgaatTCCTCTCCAAATGAAATGAACTTC                   |
| MS2(NLS)-GFP#1 f | aagagaaaggttgacagctgctATGGTGAGCAAGGGCGAG                          |
| GFP#1-linker1-r  | atgccagagcggccgcagaCTTGTACAGCTCGTCCATG                            |
| linker1-GFP#2-f  | agtctggcggccgctctggcATGGTGAGCAAGGGCGAG                            |
| GFP#2-linker2-r  | atgctaccatcgatgctaccCTTGTACAGCTCGTCCATG                           |

|                           |                                              |
|---------------------------|----------------------------------------------|
| linker2-GFP#3-f           | agggtagcatcgatggtagcATGGTGAGCAAGGGCGAG       |
| GFP#3-nos_ter-r           | ggggaaattcgggggcaattTACTTGTACAGCTCGTCC       |
| MS2(NLS)-mRuby#1-f        | aagagaaaggttgcagctgctATGGTGTCTAAGGGCGAAG     |
| mRuby#1-linker1-r         | atgccagagcggccgccagaCTTGTACAGCTCGTCCATC      |
| linker1-mRuby#2-f         | agtctggcggccgctctggcATGGTGTCTAAGGGCGAAG      |
| mRuby#2-linker2-r         | atgctaccatcgatgctaccCTTGTACAGCTCGTCCATC      |
| linker2-mRuby#3-f         | agggtagcatcgatggtagcATGGTGTCTAAGGGCGAAG      |
| mRuby#3-nos_ter-r         | ggggaaattcgggggcaattTACTTGTACAGCTCGTCCA      |
| pDS2.0-ΔsgRNA-r           | aGAGACGTCCGTCTCcCAAT                         |
| pDS2.0-ΔsgRNA-f           | AAGTGGCACCGAGTCGGTG                          |
| sgRNA2.0-MS2-flip/ext-f   | attgggagacggacgtctctGTTTAAGAGCTATGCTGGGCCAAC |
| sgRNA2.0-MS2-flip/ext-r   | attgggagacggacgtctctGTTTAAGAGCTATGCTGGGAGCAG |
| Telomere protospacer-F    | attgGGGTTTAGGGTTTAGGGTTT                     |
| Telomere protospacer-R    | aaacAAACCCTAAACCCTAAACCC                     |
| Centromere protospacer1-F | attgACCTTCTTCTTGCTTCTCAA                     |
| Centromere protospacer1-R | aaacTTGAGAAGCAAGAAGAAGGT                     |
| Centromere protospacer2-F | attgTCTTCTTGCTTCTCAAAGCT                     |
| Centromere protospacer2-R | aaacAGCTTTGAGAAGCAAGAAGA                     |
| Centromere protospacer3-F | attgATATGAGTCTTTGGCTTTGT                     |
| Centromere protospacer1-R | aaacACAAAGCCAAAGACTCATAT                     |
| GFP-F                     | CCGACAAGCAGAAGAACGGC                         |

|        |                      |
|--------|----------------------|
| GFP-R  | GCGCTTCTCGTTGGGGTCTT |
| dCas-F | AGGTGGCATACCACGAGAAG |
| dCas-R | TGGTTGTAGGTCTGCACGAG |

Supplementary Table 2. Summary of CRISPR live-cell imaging in stably transformed plants.

| <b>Species</b>        | <b>Construct used for transformation</b> | <b>dCas9 promoter</b> | <b>Target region</b> | <b>No. of gentamycin resistant plants and root lines analyzed by microscopy</b> | <b>No. of plants with signals</b> | <b>Signal description</b>                   |
|-----------------------|------------------------------------------|-----------------------|----------------------|---------------------------------------------------------------------------------|-----------------------------------|---------------------------------------------|
| <i>N. benthamiana</i> | dCas9:2xMS2:GFP                          | ubiquitin             | telomere             | 30 plants                                                                       | 7                                 | weak uniform labelling of nuclei            |
| <i>N. benthamiana</i> | dCas9:2xMS2:GFP                          | CaMV 35S              | telomere             | 33 plants                                                                       | 5                                 | uniform labelling of nuclei                 |
| <i>A. thaliana</i>    | dCas9:2xMS2:GFP                          | ubiquitin             | centromere           | 141 plants                                                                      | 27                                | dot-like and uniform labeling of nuclei     |
| <i>A. thaliana</i>    | dCas9:2xMS2:GFP                          | ubiquitin             | telomere             | -                                                                               | 3                                 | no signal or one signal only                |
| <i>A. thaliana</i>    | dCas9:2xMS2:GFP                          | CaMV 35S              | telomere             | 18 plants                                                                       | 4                                 | uniform labeling of leaf nuclei and stomata |
| <i>A. thaliana</i>    | dCas9:2xMS2:GFP                          | XVE                   | centromere           | 7 plants                                                                        | 7                                 | uniform labelling                           |
| <i>A. thaliana</i>    | dCas9:2xMS2:GFP                          | XVE                   | telomere             | 6 plants                                                                        | 6                                 | some nuclei with many dot-like signals      |
| <i>D. carota</i>      | dCas9:2xMS2:GFP                          | ubiquitin             | telomere             | 15 root lines                                                                   | 4                                 | weak uniform labelling of nuclei            |
| <i>D. carota</i>      | dCas9:2xMS2:GFP                          | CaMV 35S              | telomere             | 12 root lines                                                                   | 1                                 | weak uniform labelling of nuclei            |
